# Supplementary material for: Bis(phosphinoselenoic amides) as versatile chelating ligands for alkaline earth metal (Mg, Ca, Sr and Ba) complexes: syntheses, structure and ε-caprolactone polymerisation
Source: Royal Society of Chemistry journal article supplement (doi:10.1039/c4dt00669k), 2014-01-01
Supplement: c4dt00669k1.pdf [file c4dt00669k1.pdf]

## *Supporting Information*

### **Bis(phosphinoselenoic amides) as Versatile Chelating Ligands for Alkaline Earth Metal (Mg, Ca, Sr and Ba) Complexes: Syntheses, Structure and $\epsilon$ -Caprolactone Polymerisation**

Ravi K. Kottalanka,<sup>a</sup> A. Harinath,<sup>a</sup> Jayeeta Bhattacharjee,<sup>a</sup> H. Vignesh Babu,<sup>b</sup> and Tarun K. Panda<sup>\*a</sup>

<sup>a</sup>*Department of Chemistry, Indian Institute of Technology Hyderabad, Ordnance Factory Estate, Yeddumailaram 502205, Andhra Pradesh, India. Fax: + 91(40) 2301 6032; Tel: + 91(40) 2301 6036; E-mail: [tpanda@iith.ac.in](mailto:tpanda@iith.ac.in)*

<sup>b</sup>*School of Chemistry, University of Hyderabad, Hyderabad, India.*

**Table TS1.** Crystallographic data and structure refinement parameters for complexes **1-cis**, **1-trans** and **2-7**.

|                                             | 1 -cis                                                                        | 1 -trans                                                                                     | 2                                                                                              | 3                                                                                               | 4                                                                                              | 5                                                                                              | 6                                                                            | 7                                                                                             |
|---------------------------------------------|-------------------------------------------------------------------------------|----------------------------------------------------------------------------------------------|------------------------------------------------------------------------------------------------|-------------------------------------------------------------------------------------------------|------------------------------------------------------------------------------------------------|------------------------------------------------------------------------------------------------|------------------------------------------------------------------------------|-----------------------------------------------------------------------------------------------|
| CCDC No.                                    | 987282                                                                        | 987283                                                                                       | 987285                                                                                         | 987287                                                                                          | 987284                                                                                         | 987289                                                                                         | 987288                                                                       | 987286                                                                                        |
| Empirical formula                           | C <sub>26</sub> H <sub>26</sub> N <sub>2</sub> P <sub>2</sub> Se <sub>2</sub> | C <sub>34</sub> H <sub>42</sub> N <sub>2</sub> O <sub>2</sub> P <sub>2</sub> Se <sub>2</sub> | C <sub>38</sub> H <sub>48</sub> CaN <sub>2</sub> O <sub>3</sub> P <sub>2</sub> Se <sub>2</sub> | C <sub>38</sub> H <sub>48</sub> N <sub>2</sub> O <sub>3</sub> P <sub>2</sub> Se <sub>2</sub> Sr | C <sub>38</sub> H <sub>48</sub> BaN <sub>2</sub> O <sub>3</sub> P <sub>2</sub> Se <sub>2</sub> | C <sub>38</sub> H <sub>48</sub> MgN <sub>2</sub> O <sub>3</sub> P <sub>2</sub> Se <sub>2</sub> | C <sub>26</sub> H <sub>32</sub> B <sub>2</sub> N <sub>2</sub> P <sub>2</sub> | C <sub>34</sub> H <sub>46</sub> B <sub>2</sub> BaN <sub>2</sub> O <sub>2</sub> P <sub>2</sub> |
| Formula weight                              | 586.35                                                                        | 730.56                                                                                       | 840.72                                                                                         | 888.26                                                                                          | 937.97                                                                                         | 824.95                                                                                         | 456.10                                                                       | 735.62                                                                                        |
| T (K)                                       | 293(2)                                                                        | 293(2)                                                                                       | 150(2)                                                                                         | 150(2)                                                                                          | 150(2)                                                                                         | 150(2)                                                                                         | 293(2)                                                                       | 150(2)                                                                                        |
| λ (Å)                                       | 1.54184                                                                       | 1.54184                                                                                      | 1.54184                                                                                        | 1.54184                                                                                         | 1.54184                                                                                        | 1.54184                                                                                        | 1.54184                                                                      | 1.54184                                                                                       |
| Crystal system                              | Monoclinic,                                                                   | Orthorhombic                                                                                 | Triclinic                                                                                      | Triclinic                                                                                       | Triclinic,                                                                                     | Triclinic                                                                                      | Monoclinic                                                                   | Triclinic                                                                                     |
| Space group                                 | <i>C</i> 2/ <i>c</i>                                                          | <i>P</i> <i>b</i> <i>c</i> <i>a</i>                                                          | <i>P</i> -1                                                                                    | <i>P</i> -1                                                                                     | <i>P</i> -1                                                                                    | <i>P</i> -1                                                                                    | <i>C</i> <i>c</i>                                                            | <i>P</i> -1                                                                                   |
| <i>a</i> (Å)                                | 23.2423(12)                                                                   | 16.5026(5)                                                                                   | 9.8642(10)                                                                                     | 9.8678(11)                                                                                      | 9.6600(5)                                                                                      | 9.6053(11)                                                                                     | 12.7050(6)                                                                   | 9.2659(9)                                                                                     |
| <i>b</i> (Å)                                | 12.0610(7)                                                                    | 11.4432(3)                                                                                   | 13.4955(12)                                                                                    | 13.4550(14)                                                                                     | 17.2064(10)                                                                                    | 13.3939(14)                                                                                    | 13.7069(7)                                                                   | 14.0750(13)                                                                                   |
| <i>c</i> (Å)                                | 9.2715(5)                                                                     | 18.3315(5)                                                                                   | 16.8868(12)                                                                                    | 17.0933(17)                                                                                     | 25.4384(14)                                                                                    | 16.644(3)                                                                                      | 14.7809(7)                                                                   | 14.9320(15)                                                                                   |
| α (°)                                       | 90                                                                            | 90                                                                                           | 106.675(7)                                                                                     | 106.687(9)                                                                                      | 105.952(5)                                                                                     | 107.905(13)                                                                                    | 90                                                                           | 111.894(9)                                                                                    |
| β (°)                                       | 102.372(6)                                                                    | 90                                                                                           | 101.705(8)                                                                                     | 101.184(9)                                                                                      | 90.358(4)                                                                                      | 99.522(12)                                                                                     | 91.387(4)                                                                    | 91.583(8)                                                                                     |
| γ (°)                                       | 90                                                                            | 90                                                                                           | 106.697(9)                                                                                     | 106.567(10)                                                                                     | 102.056(5)                                                                                     | 105.115(10)                                                                                    | 90                                                                           | 101.013(8)                                                                                    |
| <i>V</i> (Å <sup>3</sup> )                  | 2538.7(2)                                                                     | 3461.77(17)                                                                                  | 1960.4(3)                                                                                      | 1987.4(4)                                                                                       | 3966.6(4)                                                                                      | 1895.5(5)                                                                                      | 2573.3(2)                                                                    | 1763.2(3)                                                                                     |
| Z                                           | 4                                                                             | 4                                                                                            | 2                                                                                              | 2                                                                                               | 4                                                                                              | 2                                                                                              | 4                                                                            | 2                                                                                             |
| <i>D</i> <sub>calc</sub> g cm <sup>-3</sup> | 1.534                                                                         | 1.398                                                                                        | 1.424                                                                                          | 1.484                                                                                           | 1.571                                                                                          | 1.445                                                                                          | 1.177                                                                        | 1.386                                                                                         |
| μ (mm <sup>-1</sup> )                       | 4.957                                                                         | 3.790                                                                                        | 4.567                                                                                          | 5.028                                                                                           | 10.938                                                                                         | 3.701                                                                                          | 1.640                                                                        | 9.855                                                                                         |
| <i>F</i> (000)                              | 1176                                                                          | 1488                                                                                         | 864                                                                                            | 900                                                                                             | 1872                                                                                           | 848                                                                                            | 968                                                                          | 752                                                                                           |
| Theta range for data collection             | 3.89 to 70.74 deg.                                                            | 4.82 to 70.73 deg.                                                                           | 2.87 to 65.00 deg.                                                                             | 3.68 to 70.77 deg.                                                                              | 3.62 to 71.13 deg.                                                                             | 2.90 to 70.69 deg.                                                                             | 4.75 to 70.77 deg.                                                           | 3.71 to 70.77deg.                                                                             |
| Limiting indices                            | -28<= <i>h</i> <=27,<br>-14<= <i>k</i> <=14,<br>-8<= <i>l</i> <=11            | -15<= <i>h</i> <=20,<br>-13<= <i>k</i> <=13,<br>-17<= <i>l</i> <=22                          | -11<= <i>h</i> <=11,<br>-14<= <i>k</i> <=15,<br>-19<= <i>l</i> <=14                            | -10<= <i>h</i> <=12,<br>-16<= <i>k</i> <=16,<br>-20<= <i>l</i> <=15                             | -11<= <i>h</i> <=11,<br>-21<= <i>k</i> <=18,<br>-21<= <i>l</i> <=31                            | -10<= <i>h</i> <=11,<br>-16<= <i>k</i> <=11,<br>-20<= <i>l</i> <=20                            | -15<= <i>h</i> <=15,<br>-10<= <i>k</i> <=16,<br>-15<= <i>l</i> <=18          | -8<= <i>h</i> <=11,<br>-17<= <i>k</i> <=15,<br>-18<= <i>l</i> <=15                            |
| Reflections collected / unique              | 4948 / 2396                                                                   | 8871 / 3273                                                                                  | 12666 / 6651                                                                                   | 14710 / 7443                                                                                    | 31367 / 14953                                                                                  | 13867 / 7151                                                                                   | 4908 / 3221                                                                  | 13627 / 6641                                                                                  |
| Completeness to theta = 71.25               | [R(int) = 0.0296]                                                             | [R(int) = 0.0251]                                                                            | [R(int) = 0.0738]                                                                              | [R(int) = 0.0610]                                                                               | [R(int) = 0.0555]                                                                              | [R(int) = 0.0400]                                                                              | [R(int) = 0.0330]                                                            | [R(int) = 0.0755]                                                                             |
| Absorption correction                       | 98.2 %                                                                        | 98.3 %                                                                                       | 99.6 %                                                                                         | 97.5 %                                                                                          | 97.4 %                                                                                         | 98.0 %                                                                                         | 97.9 %                                                                       | 97.7 %                                                                                        |
| Multi-scan                                  | Multi-scan                                                                    | Multi-scan                                                                                   | Multi-scan                                                                                     | Multi-scan                                                                                      | Multi-scan                                                                                     | Multi-scan                                                                                     | Multi-scan                                                                   | Multi-scan                                                                                    |
| Max. and min. transmission                  | 1.000 and 0.634                                                               | 1.000 and 0.659                                                                              | 1.000 and 0.179                                                                                | 1.000 and 0.586                                                                                 | 1.000 and 0.564                                                                                | 1.000 and 0.849                                                                                | 1.000 and 0.790                                                              | 1.000 and 0.527                                                                               |
| Refinement method                           | Full-matrix least-squares on F <sup>2</sup>                                   | Full-matrix least-squares on F <sup>2</sup>                                                  | Full-matrix least-squares on F <sup>2</sup>                                                    | Full-matrix least-squares on F <sup>2</sup>                                                     | Full-matrix least-squares on F <sup>2</sup>                                                    | Full-matrix least-squares on F <sup>2</sup>                                                    | Full-matrix least-squares on F <sup>2</sup>                                  | Full-matrix least-squares on F <sup>2</sup>                                                   |
| Data / restraints /                         | 2396 / 0 / 145                                                                | 3273 / 0 / 193                                                                               | 6651 / 0 / 433                                                                                 | 7443 / 0 / 433                                                                                  | 14953 / 0 / 865                                                                                | 7151 / 0 / 433                                                                                 | 3221 / 2 / 292                                                               | 6641 / 0 / 412                                                                                |

|                                   |                                                      |                                                      |                                                      |                                                      |                                                      |                                                      |                                                      |                                                      |
|-----------------------------------|------------------------------------------------------|------------------------------------------------------|------------------------------------------------------|------------------------------------------------------|------------------------------------------------------|------------------------------------------------------|------------------------------------------------------|------------------------------------------------------|
| parameters                        |                                                      |                                                      |                                                      |                                                      |                                                      |                                                      |                                                      |                                                      |
| Goodness-of-fit on F <sup>2</sup> | 1.041                                                | 1.080                                                | 1.104                                                | 1.277                                                | 1.088                                                | 1.045                                                | 1.073                                                | 1.010                                                |
| Final R indices [I>2sigma(I)]     | R <sub>1</sub> = 0.0340,<br>wR <sub>2</sub> = 0.0859 | R <sub>1</sub> = 0.0329,<br>wR <sub>2</sub> = 0.0888 | R <sub>1</sub> = 0.0674,<br>wR <sub>2</sub> = 0.2624 | R <sub>1</sub> = 0.0497,<br>wR <sub>2</sub> = 0.1484 | R <sub>1</sub> = 0.0572,<br>wR <sub>2</sub> = 0.1524 | R <sub>1</sub> = 0.0415,<br>wR <sub>2</sub> = 0.0979 | R <sub>1</sub> = 0.0456,<br>wR <sub>2</sub> = 0.1263 | R <sub>1</sub> = 0.0527,<br>wR <sub>2</sub> = 0.1148 |
| R indices (all data)              | R <sub>1</sub> = 0.0426,<br>wR <sub>2</sub> = 0.0938 | R <sub>1</sub> = 0.0346,<br>wR <sub>2</sub> = 0.0903 | R <sub>1</sub> = 0.0974,<br>wR <sub>2</sub> = 0.2936 | R <sub>1</sub> = 0.0773,<br>wR <sub>2</sub> = 0.1581 | R <sub>1</sub> = 0.0799,<br>wR <sub>2</sub> = 0.1694 | R <sub>1</sub> = 0.0555,<br>wR <sub>2</sub> = 0.1080 | R <sub>1</sub> = 0.0491,<br>wR <sub>2</sub> = 0.1312 | R <sub>1</sub> = 0.0768,<br>wR <sub>2</sub> = 0.1350 |
| Largest diff. peak and hole       | 0.417 and -0.48<br>e.A <sup>-3</sup>                 | 0.475 and -0.458<br>e.A <sup>-3</sup>                | 0.164 and -1.222<br>e.A <sup>-3</sup>                | 0.553 and -0.617<br>e.A <sup>-3</sup>                | 1.769 and -1.288<br>e.A <sup>-3</sup>                | 0.872 and -0.605<br>e.A <sup>-3</sup>                | 0.195 and -0.235<br>e.A <sup>-3</sup>                | 1.068 and -1.276<br>e.A <sup>-3</sup>                |
